# Supplementary material for: Examining perceptions of the usefulness and usability of a mobile-based system for pharmacogenomics clinical decision support: a mixed methods study
Source: PubMed Central journal article supplement (PMC4768706; doi:10.7717/peerj.1671), 2016-02-08
Supplement: peerj-04-1671-s001.pdf [file peerj-04-1671-s001.pdf]

# The Safety Code Initiative

Putting personalized medicine into the pockets of patients

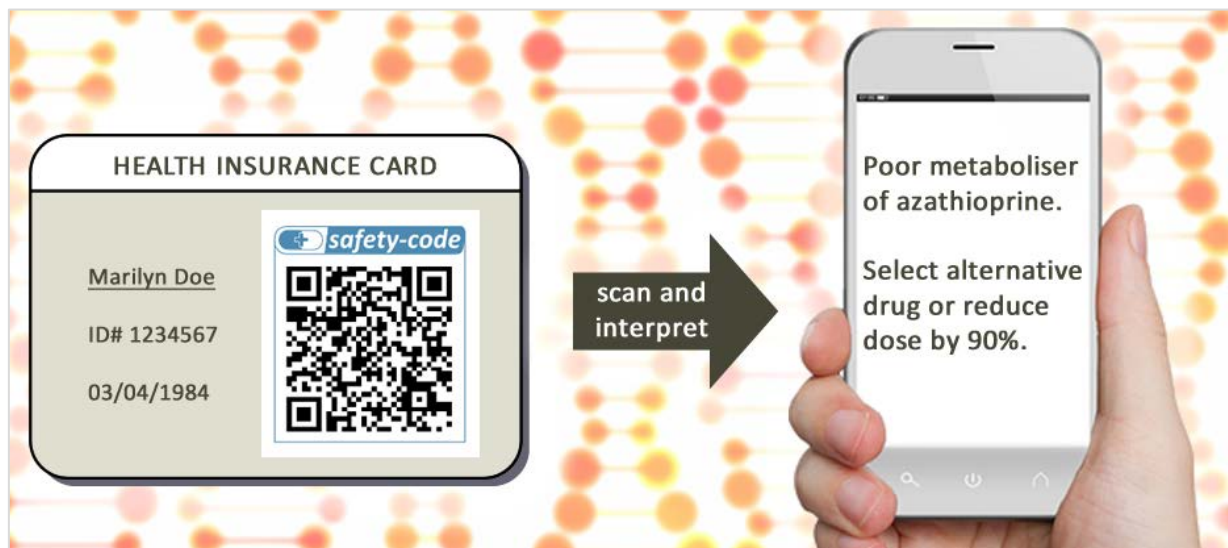

## Why you should care

The efficacy and safety of medications for individual patients can be better predicted when data about essential *pharmacogenes* of patients are known. Pharmacogenes are genes that are responsible for the metabolism, transport and effects of many common medications.

**The goal of the Safety Code initiative is to make data and clinical guidelines about these pharmacogenes and other safety-critical patient traits easily available for all patients in all health care settings.**

## How it works

- 1) A patient carries their Safety Code with them and hands it to a health care professional when asked for it.
- 2) When prescribing a new medication or modifying existing prescriptions, the health care professional can scan the Safety Code with a common smartphone and see recommendations for drug dosing and drug choice based on the individual pharmacogenomic markers of the patient.

## Quick Facts

- **Essential pharmacogenomic data of a patient are captured in a two-dimensional barcode ('QR code').** Apps for reading QR codes come pre-installed on most devices (e.g., 'Google Goggles' on Android phones), or can easily be installed from app stores. The QR code leads to a web page that gives recommendations based on up-to-date clinical guidelines.
- **Privacy aware: All data are inside the QR code and remain anonymous.** No central database is required; patients have full control over their data just like they have control over the contents of their wallets. Optionally, client-side decoding without web access is possible.
- The system currently contains **400 guidelines** for more than **60 pharmaceutical compounds** based on **60 pharmacogenes**. The system is based on guidelines issued by the committees of the *Clinical Pharmacogenetics Implementation Consortium* and the *Dutch Pharmacogenetics Working Group*, the leading international groups in clinical pharmacogenomics.
- **The system is openly available and backed by an international team of experts.**

Visit <http://safety-code.org> to find out more

Contact: Dr. Matthias Samwald, Medical University of Vienna, [matthias.samwald@meduniwien.ac.at](mailto:matthias.samwald@meduniwien.ac.at)
