# Supplementary material for: Examining perceptions of the usefulness and usability of a mobile-based system for pharmacogenomics clinical decision support: a mixed methods study
Source: PubMed Central journal article supplement (PMC4768706; doi:10.7717/peerj.1671), 2016-02-08
Supplement: peerj-04-1671-s002.pdf [file peerj-04-1671-s002.pdf]

- a. Assuming that you had the technology necessary, and your patients had genotyping results in the right format, does the Safety Code system fit into your workflow?
- b. What are the barriers to using the Safety Code system in your current workflow?
- c. What do you like about the Safety Code system?
- d. What are your concerns about the Safety Code system?
- e. What do you like about how the Safety Code system presents information?
- f. What do you dislike about how the Safety Code system presents information?
- g. Is there information you would like, but cannot find using the Safety Code system?
- h. Does the Safety Code system provide you with the information that you need to feel comfortable in making a recommendation about codeine and Marilyn?
- i. Do you have any other comments about the Safety Code system?
